# Supplementary material for: Efficient polysulfide trapping in lithium–sulfur batteries using ultrathin and flexible BaTiO3/graphene oxide/carbon nanotube layers
Source: Royal Society of Chemistry journal article supplement (doi:10.1039/d0nr08625h), 2021-01-01
Supplement: d0nr08625h1.pdf [file d0nr08625h1.pdf]

## Electronic supplementary information

# Efficient Polysulfide Trapping in Lithium-Sulfur Batteries Using Ultrathin and Flexible BaTiO<sub>3</sub>/Graphene Oxide/Carbon Nanotube Layers

Jing Wang<sup>a</sup>, Zhe Shi<sup>b</sup>, Yufeng Luo<sup>a</sup>, Datao Wang<sup>a</sup>, Hengcai Wu<sup>a</sup>, Qunqing Li<sup>ac</sup>, Shoushan Fan<sup>ac</sup>, Ju Li<sup>b</sup>, and Jiaping Wang<sup>\*ac</sup>

- a. Department of Physics and Tsinghua-Foxconn Nanotechnology Research Center, Tsinghua University, Beijing 100084, China. E-mail: jpwang@tsinghua.edu.cn.
- b. Department of Nuclear Science and Engineering and Department of Materials Science and Engineering, Massachusetts Institute of Technology, Cambridge, MA 02139, USA.
- c. Frontier Science Center for Quantum Information, Beijing 100084, China.

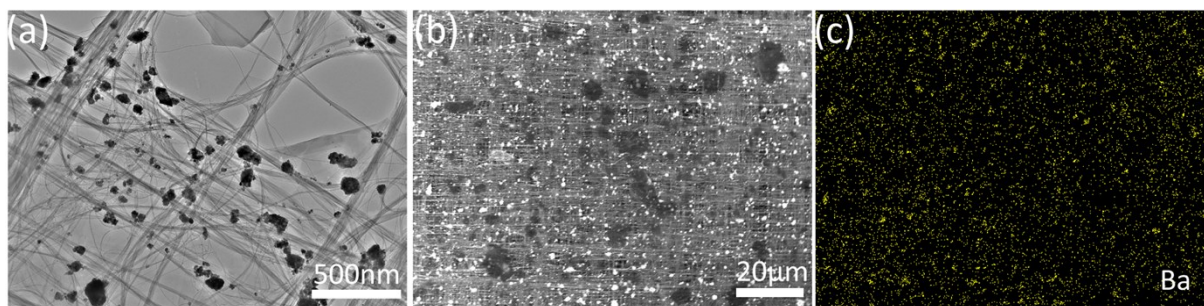

**Fig. S1** (a) TEM and (b) SEM images of a fBTO/GO@CNT layer. (c) Ba elemental mapping of (b).

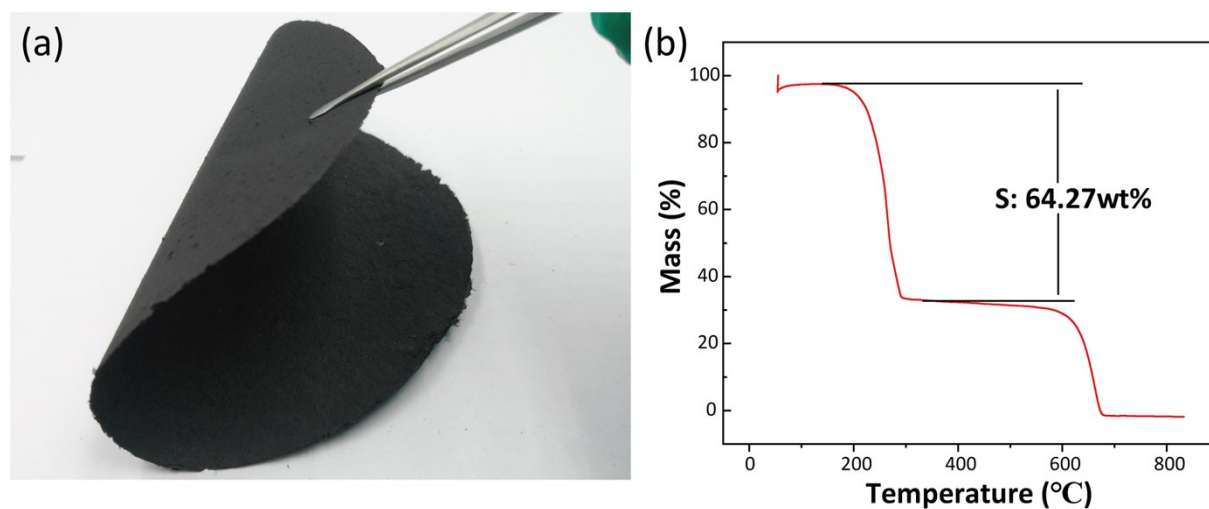

**Fig. S2** (a) Photograph and (b) TGA curve of a flexible CNT@S electrode

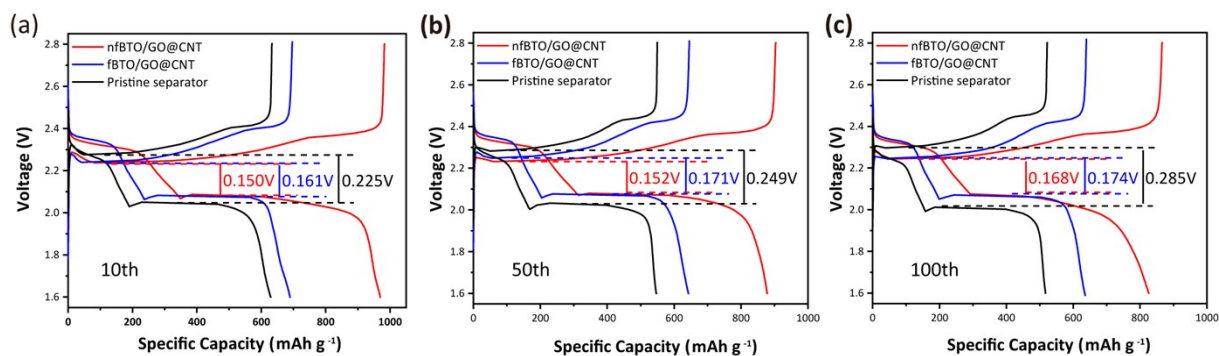

**Fig. S3** Charge-discharge curves of the electrodes with the nfBTO/GO@CNT layer, fBTO/GO@CNT layer, and pristine separator in the (a) 10th, (b) 50th, and (c) 100th cycles.

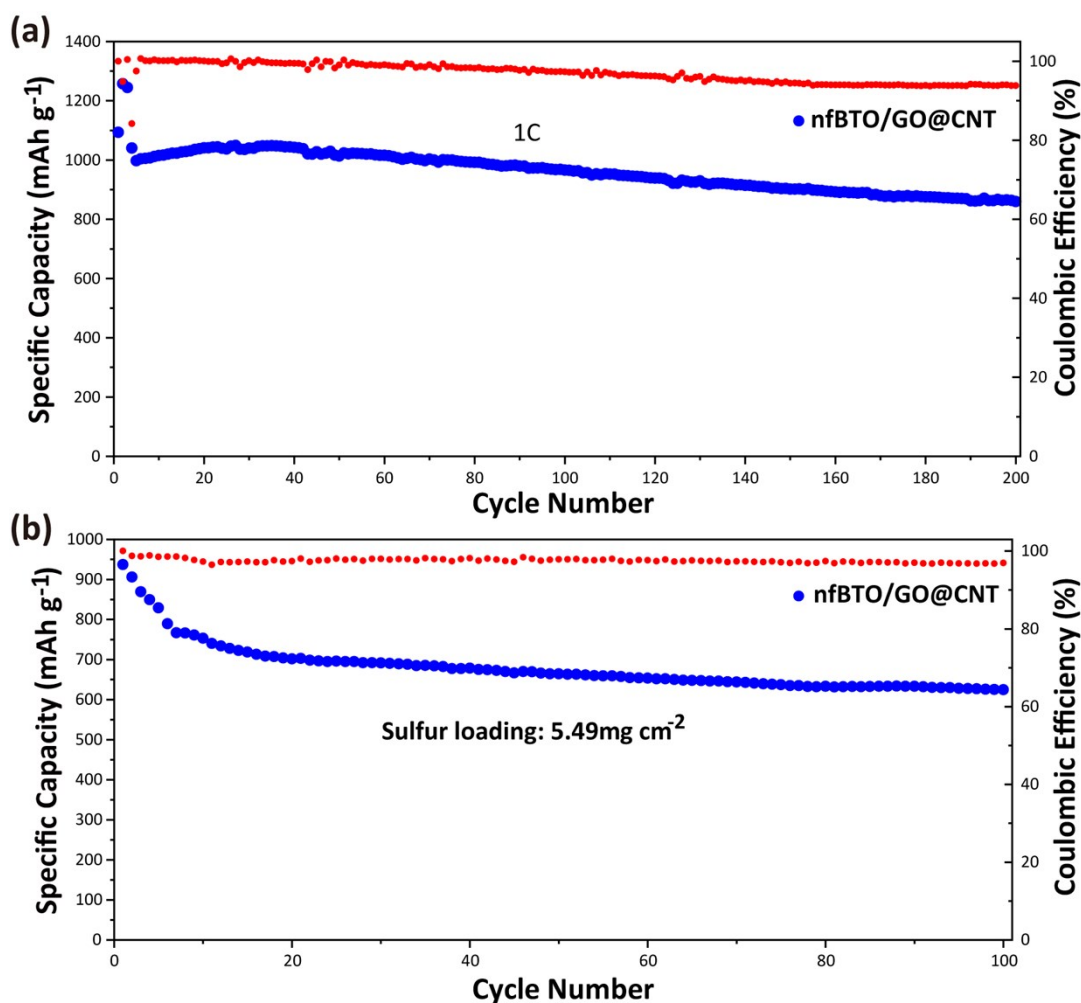

**Fig. S4** Cycling performance of (a) an electrode with the nfBTO/GO@CNT functional layer at 1 C and (b) a high-sulfur loading electrode with the nfBTO/GO@CNT functional layer at 0.2 C.

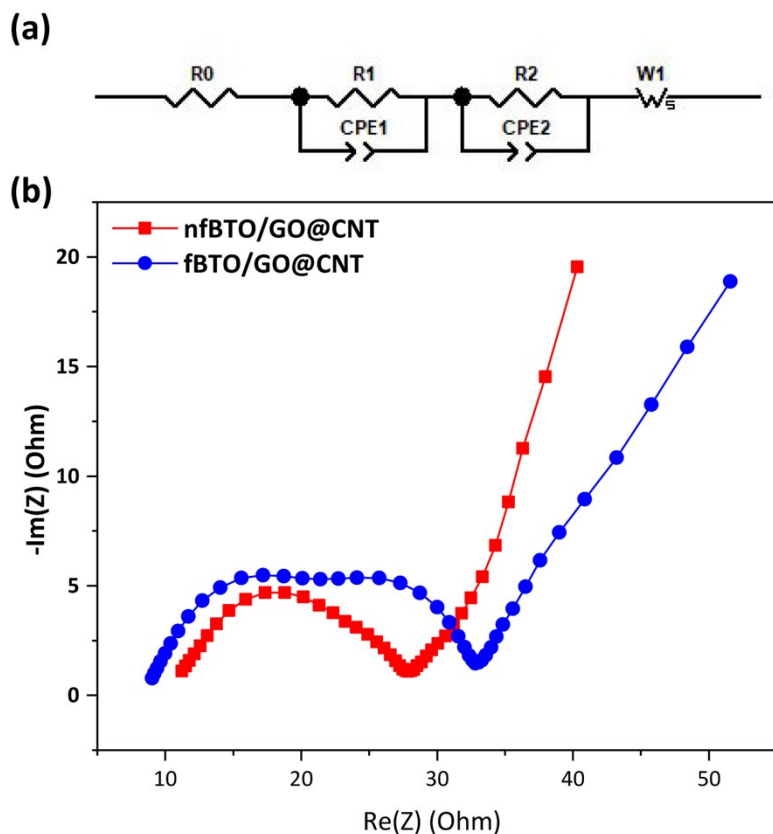

**Fig. S5** (a) The equivalent circuit of the EIS tests. (b) The EIS rests of the cells with the nfBTO/GO@CNT and fBTO/GO@CNT layers after 100 cycles.

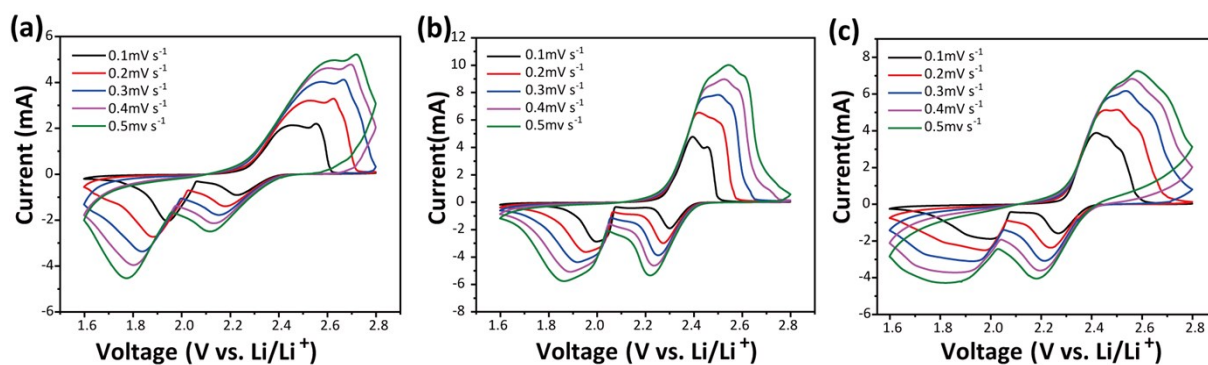

**Fig. S6** CV profiles of electrodes with (a) a pristine separator, (b) an nfBTO/GO@CNT layer, and (c) a fBTO/GO@CNT layer at different scan rates

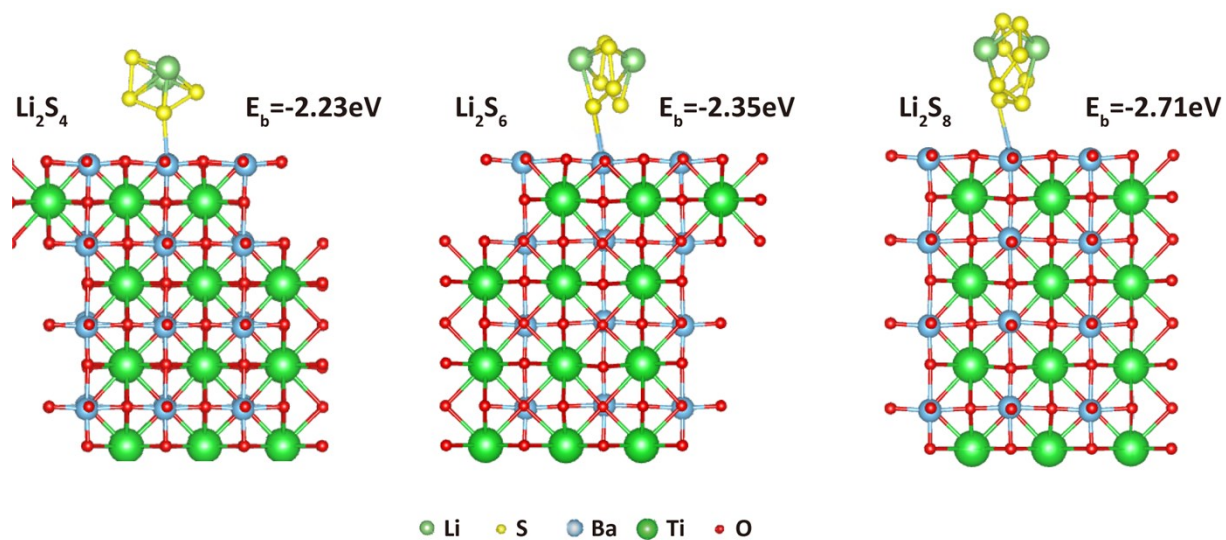

**Fig. S7** Binding geometries and DFT calculation of binding energies of fBTO with  $\text{Li}_2\text{S}_n$

**(a) fBTO/GO@CNT interlayer**

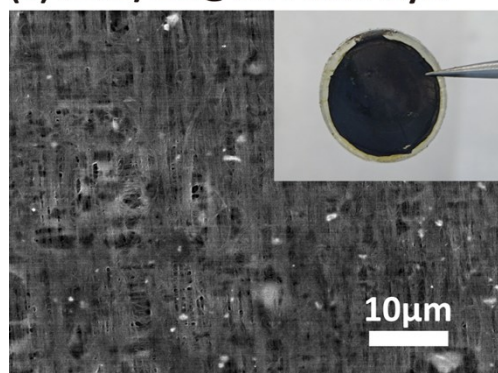

**(b) nfBTO/GO@CNT interlayer**

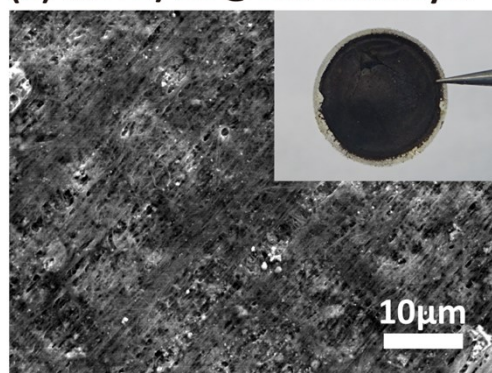

**Fig. S8** Photographs and SEM images of (a) fBTO/GO@CNT and (b) nfBTO/GO@CNT layers after 50 cycles at 0.2 C.

**Table S1** Comparison of cycle performances of the sulfur electrodes with nfBTO/GO@CNT layer and data in the literature

| <b>Functional interlayer</b>              | <b>Sulfur loading (mg cm<sup>-2</sup>)</b> | <b>Rate (C)</b> | <b>Initial capacity (mAh g<sup>-1</sup>)</b> | <b>Areal capacity (mAh cm<sup>-2</sup>)</b> | <b>References</b> |
|-------------------------------------------|--------------------------------------------|-----------------|----------------------------------------------|---------------------------------------------|-------------------|
| Dipole-aligned BTO coated separator       | 3                                          | 0.1             | 1122.1                                       | 3.37                                        | [1]               |
| rGO/BTO@CNF interlayer                    | 4.616                                      | 0.1             | 917                                          | 4.23                                        | [2]               |
| CoSe <sub>2</sub> /G functional separator | 4.35                                       | 0.2             | 1098                                         | 4.78                                        | [3]               |
| CeO <sub>2</sub> @G modified separator    | 5.03                                       | 0.3             | 589                                          | 2.96                                        | [4]               |
| Gra-HsGDY                                 | 1.2                                        | 0.2             | 1267                                         | 1.52                                        | [5]               |
| WS@SS interlayer                          | 2.4                                        | 0.1             | 1362                                         | 3.27                                        | [6]               |
| nfBTO/GO@CNT functional layer             | 5.49                                       | 0.1             | 937.4                                        | 5.15                                        | This work         |

## References

- [1] T. Yim, S. H. Han, N. H. Park, M.-S. Park, J. H. Lee, J. Shin, J. W. Choi, Y. Jung, Y. N. Jo, J.-S. Yu, and K. J. Kim, *Adv. Funct. Mater.* 2016, **26**, 7817-7823.
- [2] S. Zhang, X. Qin, Y. Liu, L. Zhang, D. Liu, Y. Xia, H. Zhu, B. Li, and F. Kang, *Adv. Mater. Interfaces* 2019, **6**, 22, 1900984.

- [3] H. Yuan, H. Peng, B. Li, J. Xie, L. Kong, M. Zhao, X. Chen, J. Huang, and Q. Zhang, *Adv. Energy Mater.* 2019, **9**, 1802768.
- [4] P. Cheng, P. Guo, K. Sun, Y. Zhao, D. Liu, and D. He, *J. Membrane Sci.* 2021, **619**, 118780.
- [5] S. Kong, D. Cai, G. Li, X. Xu, S. Zhou, X. Ding, Y. Zhang, S. Yang, X. Zhou, H. Nie, S. Huang, P. Peng, and Z. Yang, *Nanoscale* 2021, **13**, 3817-3826.
- [6] M. E. Pam, S. Huang, S. Fan, S. Geng, D. Kong, S. Chen, M. Ding, L. Guo, L. K. Ang, and H. Y. Yang, *Mater. Today Energy* 2020, **16**, 100380.
